1           **Inhibition of EV71 replication by L3HYPDH, a newly identified**  
2                                   **interferon-stimulated gene product**

3  
4   Jian Liu,<sup>a,b\*</sup> Luogen Liu,<sup>a,b\*</sup> Shinuan Zeng,<sup>a,b</sup> Xiaobin Meng,<sup>c</sup> Nanfeng Lei,<sup>c</sup> Hai  
5   Yang,<sup>c</sup> Runcai Li,<sup>a,b</sup> Xuemin Guo<sup>a,b,#</sup>

6  
7   <sup>a</sup> *Institute of Human Virology, Zhongshan School of Medicine, Sun Yat-Sen University,*  
8   *Guangzhou Guangdong, China*

9   <sup>2</sup> *Key Laboratory of Tropical Disease Control (Sun Yat-Sen University), Ministry of*  
10 *Education, Guangzhou, Guangdong, China*

11 <sup>3</sup> *Meizhou People's Hospital, Meizhou, Guangdong, China*

12  
13 Running Title: Activity and mechanism of L3HYPDH against EV71

14  
15 #Address correspondence to Xuemin Guo, email: xmguo2005@yahoo.com

16 \*Jian Liu and Luogen Liu contributed equally to this work.

17  
18 Keywords: Interferon-stimulated gene, Enterovirus 71, L3HYPDH, Antiviral activity

19 Word counts for the abstract: 150

20 Word counts for the text: 4198

21

22 **ABSTRACT**

23 Up-regulation of interferon-stimulated genes (ISGs) is key to antiviral states  
24 mediated by interferon (IFN) but little is known about activity and underlying  
25 mechanisms of most ISGs against Enterovirus 71 (EV71). EV71 causes  
26 hand-foot-mouth disease in infants and occasionally severe neurological symptoms.  
27 Here we report that the product of *L3HYPDH*, a newly identified ISG, inhibits the  
28 replication of EV71. This anti-EV71 activity was mapped to the C-terminal 60 amino  
29 acids region as well as the N-terminal region spanning from amino acid position 61 to  
30 120 of L3HYPDH protein. L3HYPDH was shown to interfere with EV71 propagation  
31 at the RNA replication and protein translation levels. Specifically, L3HYPDH impairs  
32 translation mediated by the EV71 internal ribosome entry site (IRES) but not by  
33 the HCV IRES, and this activity is conferred by the C-terminal region of L3HYPDH.  
34 Thus, L3HYPDH has antiviral activity against EV71, suggesting a potential  
35 mechanism for broad-spectrum antiviral effects of IFN.

36

37

38 **IMPORTANCE**

39 Human EV71 can cause hand-foot-mouth disease (HFMD) and even death;  
40 however, no effective anti-EV71 treatment is available. Although EV71 suppresses  
41 induction of IFN and activation of IFN signaling pathways, type I IFN treatment can  
42 enhance the anti-EV71 state. IFN-stimulated genes (ISGs) are critical for innate  
43 immune defenses; however, the antiviral activities of many ISGs are not known.  
44 EV71 is seldom used for ISGs studies. So understanding the mechanism by which  
45 ISGs exert activity against EV71 will help to better understand IFN-triggered antiviral  
46 activity and provide new strategies to treat enterovirus infection. L3HYPDH is a  
47 newly identified ISG. We report here that L3HYPDH significantly inhibits EV71  
48 replication by repressing RNA replication and protein translation, which suggests a  
49 mechanism underlying type I IFN against EV71. This would assist with the  
50 development of novel therapeutics to treat HFMD.

51

52

## 53 INTRODUCTION

54 Hand-foot-mouth disease (HFMD) is a common viral disease in infants and  
55 children across the Asian-Pacific region, characterized by fever, rash, and  
56 occasionally severe neurological symptoms (1, 2). Enterovirus 71 (EV71) is a major  
57 causative agent of HFMD. Different from many other viruses, EV71 suppresses  
58 induction of type I interferons (IFNs) and activation of IFN signaling pathways, and  
59 consequently, inhibits host anti-viral defenses (3-5). Nonetheless, EV71-infected cells  
60 still respond to type I IFN treatment and display an enhanced antiviral state. For  
61 example, *in vitro* studies showed that some type I IFNs, including IFN- $\alpha$ 4, IFN- $\alpha$ 6,  
62 IFN- $\alpha$ 14 and IFN- $\alpha$ 16, significantly reduced cytopathic effect (CPE) induced by  
63 EV71 infection (6). An IFN- $\alpha$ 2b aerosol therapy has been used topically to treat  
64 HFMD (7). However, how IFNs suppress EV71 infection is not clear.

65 IFN-mediated antiviral mechanisms are diverse and complicated. Up-regulation of  
66 IFN-stimulated genes (ISGs) has shown to be critical to innate immune defenses  
67 against invading pathogens, so studies are underway to assess their functions and  
68 underlying mechanisms for developing future antiviral therapies. ISGs are abundant  
69 and different cells respond variously to different types of IFNs and the stimulation  
70 duration, resulting in diverse ISG expression patterns (8-10). Data of several  
71 systematic detections for antiviral activity suggest that different sets of ISGs target  
72 different viruses in unique ways, and antiviral roles may be broad or specific, strong  
73 or weak (11, 12). However, EV71 is seldom used for characterizing antiviral activity  
74 of ISGs, including well-characterized classic ISGs.

75 EV71 is enterovirus of the *Picornaviridae* family. Its genomic RNA is about  
76 7400 nt long, single and positive-stranded, and contains only one open reading frame  
77 (ORF) flanked with a 5'-untranslated region (5'-UTR) and a 3'-UTR (1). The 5'-UTR  
78 contains a cloverleaf structure and an internal ribosome entry site (IRES), responsible  
79 for viral RNA replication and translation, respectively (13). The life cycle of EV71  
80 starts with attachment to the host cell surface by recognition of a specific receptor,  
81 followed by endocytosis and release of viral RNA into the cytoplasm (14). Then,  
82 EV71 IRES initiates viral translation by recruiting host proteins. Synthesized  
83 polyproteins are processed into structural and non-structural proteins by its own  
84 protease 2A and 3C. When viral proteins accumulate, viral protein 3CD binds to the  
85 cloverleaf structure of 5'UTR to stop viral protein synthesis and initiates viral RNA  
86 replication. Produced RNAs then direct viral protein synthesis in large quantities.  
87 With the assembly of viral RNAs and proteins into virions, the host cell lyses and  
88 progeny viruses are released for a new round of infection (15, 16).

89 Many ISGs are antiviral effectors but these represent a few existing ISGs, and  
90 more will be identified. Recently, 91 new ISGs were identified from human immune  
91 cell lines after treatment with the consensus interferon (17), but their antiviral activity  
92 is unclear. Using a fluorescent activated cell sorting-based strategy for screening, we  
93 identified several ISGs with anti-EV71 efficacy (data not shown). One of them is  
94 *C14orf149*, which was identified as a gene encoding a trans-3-hydroxy-L-proline  
95 dehydratase and then renamed *L3HYPDH* (18). Here, we report that this ISG product,  
96 *L3HYPDH*, possesses antiviral activity against EV71, and its mechanism of action

97 was investigated with a series of biochemical and genetic assays.

98

## 99 MATERIALS AND METHODS

### 100 Plasmids construction

101 pCAG-DsRed, a red fluorescent protein-expressing plasmid, has been described  
102 previously (19). pWSK-EV71-GFP is an infectious EV71-GFP cDNA clone, with a  
103 GFP-coding sequence inserted downstream of EV71 5'UTR and in frame fusion with  
104 the downstream *VP4*, and expression of EV71-GFP is driven by a T7 promoter (20).

105 pcDNA3.1-T7RNP expresses T7 RNA polymerase. These plasmids were kindly  
106 provided by Dr. Liguang Zhang at the Institute of Biophysics, Chinese Academy of  
107 Sciences (IBP, CAS). A siRNA targeting the coding sequence of *L3HYPDH* from  
108 position 791 to 811 was designed according to the recommendation of Sigma-Aldrich  
109 (<https://www.sigmaaldrich.com/catalog/genes>) and named shRNA149. A pair of  
110 complementary oligonucleotides

111 5'-GATCCCCCAGATGAACAGGTTGACAGAATTCAAGAGATTCTGTCAACC  
112 TGTTTCATCTGTTTTTA-3' (sense) and 5'-AGCTTAAAAACAGATGAACA  
113 GGTTGACAGAATCTCTTGAATTCTGTCAACCTGTTTCATCTGGGG-3'

114 (antisense) were synthesized with 5' ends being *Bgl*III and *Hind*III restriction site  
115 overhangs. For each oligonucleotide, the target sequence was sense followed by  
116 antisense orientations separated by a nine-nucleotide spacer. Oligonucleotides were  
117 annealed and then cloned into the *Bgl*III and *Hind*III sites of pSUPER.retro.neo+gfp  
118 (Oligoengine, herein abbreviated for pSUPER-GFP) to generate

119 pSUPER-GFP-shRNA149. *L3HYPDH* wild type (WT) and deletion mutants as  
120 indicated in Fig 3 were amplified with PCR using pLPCX-C14orf149 (17), kindly  
121 provided by Dr. Guangxia Gao at IBP, CAS, as the template. PCR products of  
122 *L3HYPDH* WT and deleted mutants were digested with *Bam*HI & *Not*I and *Kpn*I &  
123 *Xba*I, respectively, and inserted into similarly digested pcDNA4-To/myc-His B  
124 (Invitrogen), resulting in pcDNA4-L3HYPDH, pcDNA4-L3HYPDH $\Delta$ N1,  
125 pcDNA4-L3HYPDH $\Delta$ N2, pcDNA4-L3HYPDH $\Delta$ N3, pcDNA4-L3HYPDH $\Delta$ C1,  
126 pcDNA4-L3HYPDH $\Delta$ C2, and pcDNA4-L3HYPDH $\Delta$ C3. psiCHECK2-M was a  
127 modified form of psiCHECK-2 (Promega) with deletion of the HSV-TK promoter  
128 (Fig 5A). Inverse PCR was performed with high-fidelity DNA polymerase Phusion  
129 (ThermoFisher) and a pair of back-to-back primers to amplify the whole plasmid  
130 except the HSV-TK promoter sequence. PCR products were self-ligated and resulted  
131 in psiCHECK2-M; meanwhile, a *Sal*I and a *Not*I sites within the back-to-back primers  
132 were introduced into the plasmid. EV71-5'UTR and HCV-5'UTR were amplified  
133 from pWSK-EV71-GFP and pNL4-3RL-HCV-FL (21) by PCR, respectively. After  
134 digestion with *Sal*I and *Not*I, the PCR products were linked into the similarly digested  
135 psiCHECK2-M and resulted in psiCHECK2-M-EV71-5'UTR and  
136 psiCHECK2-M-HCV-5'UTR. All primers used are listed in Table S1.

### 137 **Cell culture and virus preparation**

138 293A, 293A-SCARB2, RD, Vero, Hela, and A549 cells were cultured in DMEM  
139 (Gibco) supplemented with 10% fetal bovine serum (FBS, Gibco). 293A-SCARB2  
140 (Kindly provided by Dr. Liguo Zhang at IBP, CAS), originated from a 293A cell line

141 and constitutively expresses the main EV71 receptor scavenger receptor class B  
142 member 2 (SCARB2). To generate the cell line constitutively expressing tagged  
143 L3HYPDH, 293A-SCARB2 cells were transfected with pcDNA4-L3HYPDH as  
144 described below and selected with Zeocin (200 µg/ml). Resistant colonies were  
145 individually expanded and detected by Western blot. One positive clone was chosen  
146 and named 293A-SCARB2-L3HYPDH. This process was applied to the empty vector  
147 and resulted in control cell 293A-SCARB2-Ctrl.

148 EV71-MZ (GenBank accession no. KY582572), isolated from the throat swab of  
149 an ICU patient at Meizhou People's Hospital in 2014, was amplified by successive  
150 passages in RD cells until apparent CPE appeared. EV71-GFP was generated by  
151 co-transfecting pWSK-EV71-GFP and pcDNA3.1-T7RNAP into 293A-SCARB2  
152 cells as described previously (20). Viral supernatants were titrated using a plaque  
153 assay, aliquoted, and then used for infection.

#### 154 **Transfection and infection**

155 Depending on the experiments, cells were seeded into a 24-well or 6-well plate or  
156 10 cm dish and were grown to approximately 80% confluence prior to transfection or  
157 infection. All plasmid and RNA transfections were carried out by using Lipofectamine  
158 TM 2000 (Life Technology) according to the manufacturer's instructions. After  
159 incubation for the indicated time, cells were treated as required.

160 Viral infection was performed by incubating cells with EV71-GFP or EV71-MZ at  
161 a different multiplicity of infection (MOI) for 1 h, with shaking every 15 min, and  
162 then the unbound viruses were aspirated. Cells were washed with PBS, added fresh



163 medium and incubated for specific time, followed by FACS assay, RT-qPCR  
164 measurement, or supernatant titration.

#### 165 **Plaque assay**

166 The plaque assay was performed as described previously (22). Briefly, RD cells  
167 were incubated with viral supernatants undiluted or diluted in 10-fold series for 1 h.  
168 Subsequently, the supernatants were aspirated, and cells were covered with DMEM  
169 containing 1% methylcellulose (Sigma-Aldrich) and 2% FBS. After incubation for 4  
170 days, cells were fixed with 4% paraformaldehyde (Sigma-Aldrich) and stained with  
171 0.1% crystal violet. Plaques were then quantified via visual scoring.

#### 172 **Fluorescent activated cell sorting (FACS) assay**

173 To measure GFP production from EV71-GFP,  $1 \times 10^6$  infected cells were collected  
174 and fixed in 4% paraformaldehyde for 15 min. After washing three times with PBS,  
175 cells were resuspended in 0.5 ml of PBS for flow cytometry (LSRFortessa, BD). To  
176 assess effects of *L3HYPDH* knockdown by RNAi, the cells were transfected with  
177 pSUPER-GFP-shRNA149 or pSUPER-GFP. After incubation for the indicated time,  
178 the cells were harvested and washed with PBS. GFP-positive cells were obtained  
179 through FACS, and then lysed for Western blot or seeded into a 24-well plate for  
180 EV71-GFP infection or reporter plasmid transfection as required.

#### 181 **IFN stimulation**

182 Cells were treated with 1000 IU/ml of recombinant human IFN- $\alpha$ 2b (Prospec)  
183 for different time, and then total RNAs were isolated and used to measure specific  
184 mRNA abundance by RT-qPCR.

185 ***In vitro* transcription of EV71-GFP and microscope assay of GFP**

186 pWSK-EV71-GFP was linearized *Xba*I and EV71-GFP RNAs were transcribed  
187 using the T7 RiboMax kit (Promega). After transfection into  
188 293A-SCARB2-L3HYPDH and 293A-SCARB2-Ctrl cells, the GFP signal was  
189 observed under a fluorescence microscope (System Microscope BX63, Olympus) at  
190 the indicated times; total RNAs were isolated for RT-qPCR assay.

191 **RNA isolation and RT-qPCR**

192 Total RNAs were isolated from cells using TRI Reagent (Sigma-Aldrich)  
193 according to the manufacturer's instructions. RT-qPCR was carried out as described  
194 previously (23) to measure target mRNA. Briefly, RNAs were treated with DNase  
195 using an RQ1 RNase-Free DNase Kit (Promega); cDNAs were synthesized using  
196 PrimeScript RT reagent Kit (Takara, Dalian) and then diluted and subjected to  
197 quantitative PCR using TransStart Green qPCR SuperMix (TransGen Biotch) in a  
198 CFX96 Touch Real-Time PCR Detection System (Bio-Rad). Primers used appear in  
199 Table S1.

200 **Immunofluorescence assay (IFA)**

201 Subcellular localization of L3HYPDH proteins and the attachment and  
202 endocytosis of EV71 virions were detected using IFA as described previously (24)  
203 with some modifications. Briefly, 293A-SCARB2-L3HYPDH and  
204 293A-SCARB2-Ctrl were individually seeded onto a coverslip. Polyclonal antibody  
205 (PAb) specific to c-myc (Sigma-Aldrich, 1:100) and Alexa Fluor 555-labeled  
206 anti-rabbit IgG (ThermoFisher, 1:100) were used as primary and secondary antibody,

207 respectively, to localize the subcellular distribution of the tagged L3HYPDH proteins.  
208 Similarly, 293A-SCARB2-L3HYPDH and 293A-SCARB2-Ctrl cells were infected  
209 with EV71-MZ (MOI, 100) at 4°C for 1 h to allow viral attachment or incubated for  
210 an additional 30 min at 37°C to allow viral endocytosis. The Anti-EV71 VP2  
211 monoclonal antibody (MAb) (Millipore, 1:50) and Alex flour 555-labeled anti-mouse  
212 IgG (ThermoFisher, 1:100) were used as primary and secondary antibody, respectively,  
213 to visualize EV71 virions. Nuclei were stained with DAPI (Roche). Fluorescent  
214 images of cells were captured using a Zeiss LSM780 META confocal imaging system.

#### 215 **Western blot**

216 Western blot was performed as described previously (24) with some  
217 modifications. Briefly, 48 h after transfection, the cells were lysed with SDS-lysis  
218 buffer (30 mM SDS, 50 mM pH 6.8 Tris-HCL, 100 mM DTT and 20 mg/L  
219 bromophenol blue) directly and proteins were isolated with 10% SDS-PAGE. The  
220 membrane was probed with anti-6×His MAb (Abcam) and anti-GAPDH PAb  
221 (Sangon), followed by incubation with HRP-conjugated anti-mouse IgG and  
222 anti-rabbit IgG (Santa Cruz Biotechnology), respectively. Proteins were visualized with  
223 ECL.

#### 224 **Luciferase activity assay**

225 Cell lysate was prepared by using passive lysis buffer (Promega). Firefly and  
226 *renilla* luciferase activities were measured using a Dual Luciferase Assay kit  
227 (Promega) according to the manufacturer's instructions.

#### 228 **Statistical analysis**

229 All the experiments involving counting or calculation were performed  
230 independently at least three times and data are means  $\pm$  standard deviation (SD). A  
231 Student's two-tailed *t* test was used for statistical analysis by using GraphPad Prism  
232 6.1 (GraphPad 6 Software, San Diego, CA).  $P < 0.05$  was considered statistically  
233 significant.

234

## 235 **RESULTS**

### 236 **Over-expression of L3HYPDH inhibits EV71-GFP replication**

237 The activity of L3HYPDH against EV71 was detected in 293A-SCARB2 cells  
238 using a FACS-based assay (Fig 1A). 293A-SCARB2 cells were used to facilitate  
239 EV71 infection. After co-transfection with pCAG-DsRed and pcDNA4-L3HYPDH at  
240 a ratio of 1:3, the cells were infected with EV71-GFP. All DsRed-expressing cells  
241 were assumed to express L3HYPDH, and viral replication in the DsRed-positive  
242 populations was quantified by FACS assay of GFP at 18 h post infection (Fig 1B).  
243 Cells overexpressing L3HYPDH expressed approximately 90% less GFP than control  
244 cells (Fig 1C). This result indicated that over-expression of exogenous L3HYPDH  
245 inhibits the expression of GFP, suggesting potential antiviral action against EV71  
246 replication.

### 247 **Expression of endogenous L3HYPDH suppresses EV71 replication**

248 The expression of endogenous *L3HYPDH* and its response to IFN- $\alpha$ 2b treatment  
249 were examined in different cell lines using RT-qPCR. Total RNAs were isolated from  
250 293A, 293A-SCARB2, Vero, A549, RD, and Hela cells in the absence or presence of  
251 IFN- $\alpha$ 2b for different times as indicated (Fig 2A, 2B). RT-qPCR assay showed that

252 the basal mRNA level of L3HYDPH was slightly higher in 293A, 293A-SCARB2 and  
253 Vero cells than in RD and A549, and the lowest in Hela cells (Fig 2A). Upon exposure  
254 to IFN- $\alpha$ 2b, the level of L3HYDPH mRNA was up-regulated and peaked at about 18  
255 h in 293A, 293A-SCARB2 and A549 and at about 12 h in Vero cells. Peak levels were  
256 3 to 5 times higher than the basal level (Fig 2B). In contrast, the mRNA level changed  
257 little in Hela cells and even decreased a little in RD cells (Fig 2B). These results  
258 indicate that IFN- $\alpha$ 2b stimulates the expression of L3HYDPH. However, the  
259 expression of L3HYDPH and its response to IFN- $\alpha$ 2b differ in different cells, which  
260 is common for ISGs.

261 A shRNA specific to L3HYDPH, designated as shRNA149, was designed and  
262 transcribed from pSuper-GFP-shRNA149. Its knockdown efficiency was detected in  
263 293A-SCARB2 cells by co-transfecting pcDNA4-L3HYDPH together with  
264 pSUPER-GFP-shRNA149 or with pSUPER-GFP as a control. Western blot analysis  
265 showed that the tagged L3HYDPH protein level decreased dramatically in the  
266 presence of shRNA149 (Fig 2C). To determine if the endogenous L3HYDPH could  
267 suppress EV71 replication, 293A-SCARB2 cells were transfected with  
268 pSUPER-GFP-shRNA149, and the GFP-positive cells were sorted by FACS, followed  
269 by EV71-MZ infection. RT-qPCR assay revealed that shRNA149 reduced L3HYDPH  
270 mRNA level by more than 80% (Fig 2D) and increased EV71 mRNA level from 1 to  
271 1.7 (Fig 2E), indicating that the expression of endogenous L3HYDPH impaired EV71  
272 replication. In this way, L3HYDPH possesses antiviral activity and is involved in the  
273 inherent cellular suppression on EV71 replication.

274 **Determination of the amino acid sequences essential for anti-EV71 activity of**

## 275 **L3HYDPH**

276 The region critical to L3HYDPH action against EV71 was mapped by serial  
277 deletions combination with the FACS-based assay. Three N-terminal and three  
278 C-terminal progressive deletion mutants of L3HYDPH are schematically shown in  
279 Fig 3 (middle panel), designated  $\Delta N1$ ,  $\Delta N2$ ,  $\Delta N3$ ,  $\Delta C1$ ,  $\Delta C2$ , and  $\Delta C3$ . Their coding  
280 sequences were cloned in fusion with a myc-6 $\times$ His tag at the C-terminus as with  
281 L3HYDPH WT. The resulting plasmids were individually transfected into  
282 293A-SCARB2 cells together with pCAG-DsRed followed by EV71-GFP infection as  
283 described in Fig 1A. Western blot showed that the protein levels of these truncated  
284 mutants were somewhat lower than that of WT, but still comparable (Fig 3, lower  
285 panel). FACS assay showed that L3HYDPH $\Delta N2$  lacking the amino acids from  
286 position 1 to 120 significantly impaired the antiviral activity in comparison with WT,  
287 while L3HYDPH $\Delta N1$  lacking the amino acids from position 1 to 60 only slightly  
288 weakened the antiviral activity. L3HYDPH $\Delta C1$  lacking the C-terminal 60 amino  
289 acids from 295 to 354 also weaken the antiviral activity somewhat, while further  
290 deletion did not heighten this impairment. These results indicate that the amino acid  
291 sequences from position 61 to 120 and from 295 to 354 are both required for the  
292 development of anti-EV71 activity of L3HYDPH.

## 293 **EV71 replication is suppressed in the cell line 293A-SCARB2-L3HYDPH** 294 **expressing L3HYDPH constitutively**

295 To facilitate investigation of the antiviral mechanism, the cell line  
296 293A-SCARB2- L3HYDPH expressing L3HYDPH constitutively and the  
297 corresponding control cell line 293A-SCARB2-Ctrl were generated. These two cell  
298 lines were infected with EV71-GFP at an MOI of 0.1. FACS assay showed that the

299 GFP production in 293A-SCARB2-L3HYPDH decreased to about 84% of control  
300 levels (Fig 4A). Upon infection with EV71-MZ, a clinical isolate of EV71, there was  
301 significantly less viral multiplication in 293A-SCARB2-L3HYPDH than in the  
302 control cell (Fig 4B). IFA showed that L3HYPDH proteins were mainly located in the  
303 cytoplasm (Fig 4C), consistent with its anti-EV71 action. Therefore, the cell  
304 293A-SCARB2-L3HYPDH displays remarkable anti-EV71 activity due to the  
305 over-expression of L3HYPDH, and thus can be exploited to uncover the underlying  
306 antiviral mechanism.

### 307 **L3HYPDH interferes with the synthesis of viral RNA and proteins**

308 The effects of L3HYPDH on different life stages of EV71 replication were  
309 examined in 293A-SCARB2-L3HYPDH cells. Based on the knowledge that EV71 is  
310 only adsorbed on the cell surface and could not finish endocytosis at 4°C,  
311 293A-SCARB2-L3HYPDH and the control cells were incubated with EV71-MZ for 1  
312 h at 4°C followed by IFA with the antibody specific to EV71 VP2. As shown in Fig  
313 5A, massive number of virions distributed on the outer surfaces of both cell lines,  
314 showing no difference in numbers, indicating that L3HYPDH could not interfere with  
315 EV71 attachment. After attachment at 4°C, the viruses were further incubated with the  
316 cells for an additional 30 min at 37°C to complete endocytosis. IFA showed that many  
317 viruses entered both cell lines, showing little difference (Fig 5B), indicating that  
318 L3HYPDH had no effect on EV71 endocytosis. In this way, these results demonstrate  
319 that L3HYPDH does not impede the viral attachment and endocytosis.

320 The effects of L3HYPDH on the synthesis of viral RNA and proteins were  
321 investigated by monitoring changes in their levels over time.  
322 293A-SCARB2-L3HYPDH and 293A-SCARB2-Ctrl cells were infected with

323 EV71-MZ. Total RNAs were isolated at different times post-infection and the viral  
324 RNA abundance was measured by RT-qPCR. The increase in EV71 RNA levels over  
325 time in 293A-SCARB2-L3HYPDH cells was much lower than in the control cells  
326 (Fig 5C). Due to the tight cross-talk between viral translation and viral RNA synthesis,  
327 these results suggested that L3HYPDH might inhibit the synthesis of viral RNA,  
328 proteins, or both. To further confirm this assumption, EV71-GFP RNAs were  
329 transfected into 293A-SCARB2- L3HYPDH and the control cell, and then the viral  
330 RNA and GFP proteins were measured and compared at different times after  
331 transfection. Microscope and RT-qPCR analyses showed that both the number of  
332 GFP-positive cells and the viral RNA level were much lower in  
333 293A-SCARB2-L3HYPDH cells than in the control cells (Fig 5D, 5E). These results  
334 provide more evidence that L3HYPDH might suppress viral RNA replication, viral  
335 protein synthesis, or both.

### 336 **L3HYPDH impairs the translation mediated by EV71-5'UTR**

337 The repression of L3HYPDH on viral protein synthesis was investigated using a  
338 bicistronic reporter system. As shown in Fig 6A, psiCHECK-2-based reporter  
339 plasmids were constructed with the HSV-TK promoter deleted to generate the control  
340 (psiCHECK2-M) or replaced with EV71-5'UTR or HCV-5'UTR, which contains  
341 EV71 IRES or HCV IRES, respectively. pcDNA4-L3HYPDH or the empty vector  
342 was transfected into 293A cells together with one of the three reporter plasmids at a  
343 ratio of 3:1, and then the luciferase activity and mRNA level were measured after  
344 incubation for 48 h. For these reporters, the mRNA level ratio of *Fluc/Rluc* in  
345 L3HYPDH-overexpressed cells was equal to that in the empty vector-transfected cells  
346 as revealed by RT-qPCR (Fig 6B). However, the luciferase activity ratio (Fluc/Rluc)  
347 showed variability (Fig 6C). Whether L3HYPDH was over-expressed or not, the



348 Fluc/Rluc ratio of the control reporter was extremely low due to the absence of IRES;  
349 the ratio of the EV71-5'UTR-containing reporter reduced by 29% upon  
350 overexpression of L3HYPDH; while the ratio of the HCV-5'UTR-containing reporter  
351 changed little. We here proposed that L3HYPDH could specifically inhibit the  
352 reporter translation mediated by EV71 IRES. RNAi assay further provided evidence  
353 for this speculation. 293A-SCARB2-L3HYPDH cells were transfected with the  
354 shRNA149-expressing plasmid or the empty vector. Then the GFP-positive cells were  
355 isolated and transfected with the reporter plasmids. Compared to the control cells, the  
356 Fluc/Rluc ratio of the EV71-5'UTR-containing reporter in  
357 293A-SCARB2-L3HYPDH cells increased moderately upon L3HYPDH knockdown  
358 (Fig 6D).

359 Given that the amino acid sequence from position 61 to 120 and the C-terminal  
360 60 amino acids together contribute to anti-EV71 activity, we examined whether these  
361 sequences were involved in the action of inhibiting the EV71 IRES-mediated  
362 translation. 293A cells were transfected with the plasmids expressing L3HYPDH WT  
363 or deletion mutants together with the EV71-5'UTR-containing bicistronic reporter  
364 plasmids. Reporter assay revealed that, compared to the empty vector, the expression  
365 of WT,  $\Delta$ N1,  $\Delta$ N2 and  $\Delta$ N3 reduced the Fluc/Rluc ratio by approximately 25% in  
366 293A cells, consisting with the result shown above; while the expression of  $\Delta$ C1,  $\Delta$ C2,  
367 and  $\Delta$ C3 had little effect on the ratio by comparison with control cells (Fig 6E). In  
368 combination with the results shown in Fig 3, these data indicate that the C-terminal  
369 sequence containing 60 amino acids from 295 to 354 is required for L3HYPDH to  
370 inhibit EV71-IRES-mediated translation.

371 Altogether, these results indicate that L3HYPDH can specifically impair the  
372 translation initiated by EV71-5'UTR, and the C-terminal region is responsible for this

373 inhibiting activity.

374

## 375 **DISCUSSION**

376 In this work, we report that the recently identified ISG product L3HYPDH has  
377 antiviral activity against EV71 according to RNAi knockdown and over-expression  
378 experiments. Over-expression of L3HYPDH repressed GFP production of EV71-GFP  
379 (Fig 1B, 4B) and caused significant inhibition of propagation of the clinical isolate  
380 EV71-MZ (Fig 4C). *L3HYPDH* knockdown increased EV71 mRNA in 293A-CARB2  
381 cells (Fig 2E), highlighting that this gene is an important ISG with antiviral activity.  
382 Additionally, our data showed that IFN- $\alpha$ 2b treatment was less effective against EV71  
383 in cell culture when expression of L3HYPDH was depressed by RNAi (Fig S1).  
384 Therefore, L3HYPDH is key to antiviral activity of IFN- $\alpha$ 2b against EV71. The  
385 potential activity of L3HYPDH against other viruses is not known. Given that  
386 different viruses are usually targeted by unique sets of ISGs (11), an extensive  
387 investigation on L3HYPDH will help to further elucidate the mechanism of  
388 IFN-mediated innate immunity against invading viruses.

389 Our data show that L3HYPDH may interfere with EV71 replication at post-entry  
390 stage (Fig 4). Bicistronic reporter assays confirmed that expression of L3HYPDH  
391 inhibited translation initiated by EV71 IRES (Fig 6B), however, the reporter protein  
392 was less reduced than EV71 RNA and virus-carrying GFP production during the first  
393 round of infection (Fig 1B, 4A, 5C-E). These inconsistencies suggest that L3HYPDH  
394 hampers EV71 replication at steps other than translation. Although inhibition of viral

395 RNA replication is likely, other potential effects on viral RNA stability, viral  
396 assembly and viral release cannot be excluded. Therefore, L3HYPDH inhibits EV71  
397 replication at least at two levels, and these data are in agreement with previous studies  
398 indicating that many ISGs block viral replication at multiple stages of the viral life  
399 cycle (25-27). Considering that a range of proteins are involved in the viral RNA  
400 replication and translation process, we performed co-immunoprecipitation and tandem  
401 affinity purification combination mass spectrometry to screen for proteins interacting  
402 with L3HYPDH. Neither viral nor host proteins were identified (data not shown).  
403 These results suggest that the association of L3HYPDH proteins with other proteins  
404 should be transient or weak. L3HYPDH might also function by binding to the viral  
405 RNA directly; however, no known RNA-binding domains were predicted with online  
406 software (data not shown).

407 Viral translation is completely host cell-dependent. To maximize efficiency,  
408 different viruses evolved many strategies to facilitate selective translation of viral  
409 mRNAs over host transcripts (15, 28-30). Among these, the IRES-mediated  
410 translation initiation is necessary for picornavirus and hepacivirus to replicate (13, 31).  
411 Reporter assays showed that expression of L3HYPDH impaired initiation of  
412 translation mediated by EV71 IRES but not HCV IRES (Fig 6B, 6C). These two  
413 IRES differ in nucleotide length and structure as well as in host factors required for  
414 translation initiation and regulation (32). A potential target of L3HYPDH should be  
415 involved in EV71-5'UTR-mediated translation. Given that an ISG may interfere with  
416 different stages of different viral life cycles, whether L3HYPDH has the activity  
417 against HCV is unclear. Meanwhile, despite being present in all picornaviruses, IRES  
418 is diverse in length and structure and requires different host factors to function

419 (33-35). Whether L3HYPDH can inhibit other genres of picornavirus by interfering  
420 with IRES-mediated translation is not clear is not clear, but this is worthy of study.

421 L3HYPDH is a trans-3-hydroxy-L-proline dehydratase, and specifically catalyzes  
422 the dehydration of dietary trans-3-hydroxy-L-proline and from degradation of proteins  
423 such as collagen IV that contain it. This dehydratase contains two active sites, a Cys  
424 residue at the 104 position and a Thr residue at the 273 position (18). Interestingly,  
425 the region required for anti-EV71 activity was mainly mapped to the amino acid  
426 sequence from position 61 to 120 of L3HYPDH protein (Fig 3), which contains the  
427 Cys104 active site. Whether this proline dehydratase activity is involved in the  
428 anti-EV71 activity is not known. L3HYPDH functions as an anti-EV71 effector.  
429 Understanding ISG products and antiviral spectra, as well as their mechanisms of  
430 action and biological function will help create novel therapeutics for HFMD.

431

## 432 **ACKNOWLEDGEMENTS**

433 This work was supported by the grants from Guangdong Innovative Research  
434 Team Program (2009010058), the National Key Program for Infectious Disease of  
435 China (2012ZX10001003), and Science and Technology Planning Project of  
436 Guangdong Province (A2016467 to X. Meng). We thank Dr. Liguozhang for  
437 providing the plasmids pCAG-DsRed, pWSK-EV71-GFP, pcDNA3.1-T7RNP and the  
438 cell line 293A-SCARB2. We also thank Dr. Guangxia Gao for providing the plasmids  
439 pLPCX-C14orf149 and pNL4-3RL-HCV-FL.

440

## 441 **REFERENCES**

442 1. **Brown BA, Oberste MS, Alexander JP, Jr., Kennett ML, Pallansch MA.** 1999.

443 Molecular epidemiology and evolution of enterovirus 71 strains isolated from

- 444 1970 to 1998. *J Virol* **73**:9969-9975.
- 445 2. **Mcminn PC**. 2002. An overview of the evolution of enterovirus 71 and its  
446 clinical and public health significance. *FEMS Microbiol Rev* **26**:91-107.
- 447 3. **Lei X, Liu X, Ma Y, Sun Z, Yang Y, Jin Q, He B, Wang J**. 2010. The 3C  
448 Protein of Enterovirus 71 Inhibits Retinoid Acid-Inducible Gene I-Mediated  
449 Interferon Regulatory Factor 3 Activation and Type I Interferon Responses. *J*  
450 *Virol* **84**:8051-8061.
- 451 4. **Lei X, Sun Z, Liu X, Jin Q, He B, Wang J**. 2011. Cleavage of the adaptor  
452 protein TRIF by enterovirus 71 3C inhibits antiviral responses mediated by  
453 Toll-like receptor 3. *J Virol* **85**:8811-8818.
- 454 5. **Lu J, Yi L, Zhao J, Yu J, Chen Y, Lin MC, Kung HF, He ML**. 2012.  
455 Enterovirus 71 disrupts interferon signaling by reducing the level of interferon  
456 receptor 1. *J Virol* **86**:3767-3776.
- 457 6. **Yi L, He Y, Chen Y, Kung HF, He ML**. 2011. Potent inhibition of human  
458 enterovirus 71 replication by type I interferon subtypes. *Antiviral Ther* **16**:51-58.
- 459 7. **Lin H, Huang L, Zhou J, Lin K, Wang H, Xue X, Xia C**. 2016. Efficacy and  
460 safety of interferon-alpha2b spray in the treatment of hand, foot, and mouth  
461 disease: a multicenter, randomized, double-blind trial. *Arch Virol* **161**:3073-3080.
- 462 8. **De Veer MJ, Holko M, Frevel M, Walker E, Der S, Paranjape JM, Silverman**  
463 **RH, Williams BRG**. 2001. Functional classification of interferon-stimulated  
464 genes identified using microarrays. *J Leukoc Biol* **69**:912-920.
- 465 9. **Der SD, Zhou A, Williams BRG, Silverman RH**. 1998. Identification of genes

- 466 differentially regulated by interferon  $\alpha$ ,  $\beta$ , or  $\gamma$  using oligonucleotide arrays. Proc  
467 Natl Acad Sci U S A **95**:15623-15628.
- 468 10. **Liu SY, Sanchez DJ, Aliyari R, Lu S, Cheng G.** 2012. Systematic identification  
469 of type I and type II interferon-induced antiviral factors. Proc Natl Acad Sci U S  
470 A **109**:4239-4244.
- 471 11. **Schoggins JW, Rice CM.** 2011. Interferon-stimulated genes and their antiviral  
472 effector functions. Curr Opin Virol **1**:519-525.
- 473 12. **Schneider WM, Chevillotte MD, Rice CM.** 2014. Interferon-stimulated genes: a  
474 complex web of host defenses. Annu Rev Immunol **32**:513-545.
- 475 13. **Martínez-Salas E, Francisco-Velilla R, Fernandez-Chamorro J, Lozano G,**  
476 **Díaz-Toledano R.** 2015. Picornavirus IRES elements: RNA structure and host  
477 protein interactions. Virus Res **206**:62-73.
- 478 14. **Dang M, Wang X, Wang Q, Wang Y, Lin J, Sun Y, Li X, Zhang L, Lou Z,**  
479 **Wang J, Rao Z.** 2014. Molecular mechanism of SCARB2-mediated attachment  
480 and uncoating of EV71. Protein Cell **5**:692-703.
- 481 15. **Lin JY, Chen TC, Weng KF, Chang SC, Chen LL, Shih SR.** 2009. Viral and  
482 host proteins involved in picornavirus life cycle. J Biomed Sci **16**:103.
- 483 16. **Lei X, Cui S, Zhao Z, Wang J.** 2015. Etiology, pathogenesis, antivirals and  
484 vaccines of hand, foot, and mouth disease. Natl Sci Rev **2**:268-284.
- 485 17. **Zhang X, Yang W, Wang X, Zhang X, Tian H, Deng H, Zhang L, Gao G.**  
486 2018. Identification of new type I interferon-stimulated genes and investigation  
487 of their involvement in IFN-beta activation. Protein Cell **1-9**.

- 488 18. **Visser WF, Verhoeven-Duif NM, de Koning TJ.** 2012. Identification of a  
489 human trans-3-hydroxy-L-proline dehydratase, the first characterized member of  
490 a novel family of proline racemase-like enzymes. *J Biol Chem* **287**:21654-21662.
- 491 19. **Matsuda T, Cepko CL.** 2004. Electroporation and RNA interference in the  
492 rodent retina in vivo and in vitro. *Proc Natl Acad Sci U S A* **101**:16-22.
- 493 20. **Zhang X, Yang P, Wang N, Zhang J, Li J, Guo H, Yin X, Rao Z, Wang X,**  
494 **Zhang L.** 2017. The binding of a monoclonal antibody to the apical region of  
495 SCARB2 blocks EV71 infection. *Protein Cell* **8**:590-600.
- 496 21. **Zhu Y, Wang X, Goff SP, Gao G.** 2012. Translational repression precedes and is  
497 required for ZAP-mediated mRNA decay. *EMBO J* **31**:4236-4246.
- 498 22. **Tang WF, Huang RT, Chien KY, Huang JY, Lau KS, Jheng JR, Chiu CH,**  
499 **Wu TY, Chen CY, Horng JT.** 2015. Host miR-197 plays a negative regulatory  
500 role in the enterovirus 71 infectious cycle by targeting the RAN protein. *J Virol*  
501 **90**:1424-1438.
- 502 23. **Zhou S, Chen X, Meng X, Zhang G, Wang J, Zhou D, Guo X.** 2015. "Roar" of  
503 blaNDM-1 and "silence" of blaOXA-58 co-exist in *Acinetobacter pittii*. *Sci Rep*  
504 **5**:8976.
- 505 24. **Li K, Zhou S, Guo Q, Chen X, Lai DH, Lun ZR, Guo X.** 2017. The eIF3  
506 complex of *Trypanosoma brucei*: composition conservation does not imply the  
507 conservation of structural assembly and subunits function. *RNA* **23**:333-345.
- 508 25. **Pichlmair A, Lassnig C, Eberle CA, Gorna MW, Baumann CL, Burkard TR,**  
509 **Burckstummer T, Stefanovic A, Krieger S, Bennett KL, Rulicke T, Weber F,**

- 510        **Colinge J, Muller M, Superti-Furga G.** 2011. IFIT1 is an antiviral protein that  
511        recognizes 5'-triphosphate RNA. *Nat Immunol* **12**:624-630.
- 512    26. **Kato H, Takeuchi O, Sato S, Yoneyama M, Yamamoto M, Matsui K,**  
513        **Uematsu S, Jung A, Kawai T, Ishii KJ.** 2006. Differential roles of MDA5 and  
514        RIG-I helicases in the recognition of RNA viruses. *Nature* **441**:101-105.
- 515    27. **Haller O, Kochs G.** 2011. Human MxA protein: an interferon-induced  
516        dynamin-like GTPase with broad antiviral activity. *J Interferon Cytokine Res*  
517        **31**:79-81.
- 518    28. **Du H, Yin P, Yang X, Zhang L, Jin Q, Zhu G.** 2014. Enterovirus 71 2C Protein  
519        Inhibits NF- $\kappa$ B Activation by Binding to RelA(p65). *Sci Rep* **5**:14302.
- 520    29. **Sharma R, Raychaudhuri S, Dasgupta A.** 2004. Nuclear entry of poliovirus  
521        protease-polymerase precursor 3CD: implications for host cell transcription  
522        shut-off. *Virology* **320**:195-205.
- 523    30. **Weng KF, Li ML, Hung CT, Shih SR.** 2009. Enterovirus 71 3C Protease  
524        Cleaves a Novel Target CstF-64 and Inhibits Cellular Polyadenylation. *PLoS*  
525        *Pathog* **5**:e1000593.
- 526    31. **Honda M, Ping LH, Rijnbrand RC, Amphlett E, Clarke B, Rowlands D,**  
527        **Lemon SM.** 1996. Structural requirements for initiation of translation by internal  
528        ribosome entry within genome-length hepatitis C virus RNA. *Virology*  
529        **222**:31-42.
- 530    32. **Michael Gale J, Tan SL, Katze MG.** 2000. Translational Control of Viral Gene  
531        Expression in Eukaryotes. *Microbiol Mol Biol Rev* **64**:239-280.



- 532 33. **Gingras AC, Svitkin Y, Belsham GJ, Pause A, Sonenberg N.** 1996. Activation  
533 of the Translational Suppressor 4E-BP1 Following Infection with  
534 Encephalomyocarditis Virus and Poliovirus. *Proc Natl Acad Sci U S A*  
535 **93**:5578-5583.
- 536 34. **Andreev DE, Fernandezmiragall O, Ramajo J, Dmitriev SE, Terenin IM,**  
537 **Martinezsalas E, Shatsky IN.** 2007. Differential factor requirement to assemble  
538 translation initiation complexes at the alternative start codons of foot-and-mouth  
539 disease virus RNA. *RNA* **13**:1366-1374.
- 540 35. **Sweeney TR, Abaeva IS, Pestova TV, Hellen CU.** 2014. The mechanism of  
541 translation initiation on Type 1 picornavirus IRESs. *EMBO J* **33**:76–92.  
542  
543

544 **Figure Legends**

545 **Fig 1. FACS-based assay for antiviral activity of L3HYPDH against EV71-GFP**

546 **replication.** (A) Overview of the procedures detecting anti-EV71 activity of  
547 over-expressed L3HYPDH using FACS. (B) FACS plots of L3HYPDH inhibition of  
548 EV71-GFP in 293A-SCARB2 cells. Numerals represent percent of total cell counts.  
549 (C) GFP production, which was calculated by multiplying GFP and DsRed co-positive  
550 cell number by the mean value of GFP intensity. The value of the control cells  
551 transfected with empty vector was set as 100%. Results are represented as means  $\pm$   
552 SD of three independent experiments. \*,  $P < 0.05$ .

553 **Fig 2. Anti-EV71 activity of the endogenous L3HYPDH.** (A) RT-qPCR assay of the

554 endogenous *L3HYPDH* mRNA level in different cell lines, which was normalized to  
555 *GAPDH* mRNA level. (B) RT-qPCR assay of *L3HYPDH* expression with IFN- $\alpha$ 2b  
556 (1000 IU/ml) treatment for indicated time in different cell lines. *L3HYPDH* mRNA  
557 level was normalized to that of *GAPDH*. The relative mRNA level from untreated  
558 cells (marked as 0 h) was set as 1. (C) Western blot of knockdown efficiency of  
559 shRNA149 targeting *L3HYPDH*. 293A-SCARB2 cells were transfected with  
560 pcDNA4-L3HYPDH together with shRNA149-expressing plasmid or control plasmid  
561 (Ctrl) at a ratio of 1:3. The GFP-positive cells were sorted and then infected with  
562 EV71, followed by RT-qPCR analyses of *L3HYPDH* mRNA (D) and EV71 2C mRNA  
563 after depression of L3HYPDH expression. RT-qPCR data are means  $\pm$  SD of three  
564 independent experiments. \*,  $P < 0.05$ .

565 **Fig 3. Mapping amino acid sequence required for anti-EV71 activity of**

566 **L3HYPDH.** Deletion mutants of L3HYPDH were schematically shown in the middle  
567 panel. Numbers indicate starting and ending amino acid. The plasmids expressing  
568 L3HYPDH wild type (WT) or truncated mutants were individually transfected into  
569 293A-SCARB2 cells together with pCAG-DsREd at a ratio of 3:1, followed by  
570 EV71-GFP infection. Same performance was done the empty vector used as a control  
571 (Ctrl). L3HYPDH WT proteins or deletion mutants were analyzed by Western blot  
572 with anti-6×His MAb (lower panel). GFP production from EV71-GFP was detected  
573 using FACS and calculated as described in Fig1C. The value from control was set as  
574 100%. Data are represented as mean  $\pm$  SD of three independent experiments. \*,  $P <$   
575 0.05.

576 **Fig 4. Evaluating antiviral activity of 293A-SCARB2- L3HYPDH cells.**  
577 293A-SCARB2-L3HYPDH and the control cell 293A-SCARB2-Ctrl were infected  
578 with EV71-GFP (MOI, 0.1). GFP production was detected using FACS (A) and  
579 calculated (B). Data are represented as mean  $\pm$  SD of three independent experiments.  
580 \*,  $P <$  0.05. (C) Time-viral yield assay. 293A-SCARB2-L3HYPDH and the control  
581 cell were individually infected with EV71-MZ (MOI, 2). The culture supernatants  
582 were harvested at different time points as indicated and titrated by plaque assay. Data  
583 for each time point are means  $\pm$  SD of three independent experiments. (D) Subcellular  
584 localization of tagged L3HYPDH proteins using IFA. Nuclear DNA was stained with  
585 DAPI.

586 **Fig 5. Stage assays for unveiling the mechanism of L3HYPDH against EV71.**  
587 Effect of L3HYPDH on attachment (A) and endocytosis (B) of EV71 was examined  
588 using IFA. 293A-SCRB2-L3HYPDH and 293A-SCARB2-Ctrl cells were infected

589 with EV71-MZ (MOI, 100). Nuclei were stained with DAPI. (C) Effect of L3HYPDH  
590 on viral RNA measured with RT-qPCR. 293A-SCARB2-L3HYPDH and control cell  
591 (Ctrl) were infected with EV71-MZ (MOI, 2). EV71 2C mRNA level was measured at  
592 indicated times and normalized to that of *GAPDH*, with the relative level in control  
593 cell at 2 h post infection set as 1. EV71-GFP RNAs were transfected into  
594 293A-SCARB2-L3HYPDH and control cell (Ctrl). GFP signal and EV71 2C RNA  
595 level at different times post transfection were examined by fluorescent microscope (D)  
596 and RT-qPCR (E), respectively. All the RT-qPCR data are represented as means  $\pm$  SD  
597 of three independent experiments. \*,  $P < 0.05$ .

598 **Fig 6. Bicistronic reporter assay to measure the effect of L3HYPDH on EV71**

599 **IRES mediated translation.** (A) Schematic of bicistronic reporters. Rluc is translated  
600 in a cap-dependent manner and Fluc in an IRES-dependent manner.  
601 pcDNA4-L3HYPDH or empty vector was transfected into 293A cells together with  
602 psiCHECK2-M, psiCHECK2-EV71-5'UTR, or psiCHECK2-HCV-5'UTR. Effects of  
603 L3HYPDH on the reporter expression were estimated by RT-qPCR (B) and luciferase  
604 activity assay (C). Fluc/Rluc ratio was calculated, with the relative value from the  
605 cells transfected with empty vectors was set as 1. (D) RNAi assay of effect of  
606 L3HYPDH on reporter expression mediated by IRES. pSUPER-GFP-shRNA149 or  
607 pSUPER-GFP was transfected into 293A-SCARB2-L3HYPDH cell. The GFP  
608 positive cells were transfected with psiCHECK2-M or psiCHECK2-M-EV71-5'UTR.  
609 Luciferase activity was measured, with Fluc/Rluc ratio from cells co-transfected with  
610 psiCHECK2-M and pSUPER-GFP set as 1. (E) Effect of L3HYPDH deletion on  
611 reporter expression. The plasmids expressing L3HYPDH WT or deletion mutants  
612 were individually transfected into 293A cells together with  
613 psiCHECK2-EV71-5'UTR at a ratio of 3:1. Transfection with pcDNA4 was used as a

614 control (Ctrl). Luciferase activities were measured. Fluc/Rluc ratio was calculated,

615 with the relative value from the cells transfected with the empty vector set as 1. Data

616 are means  $\pm$  SD of three independent experiments. \*,  $P < 0.05$ .

617

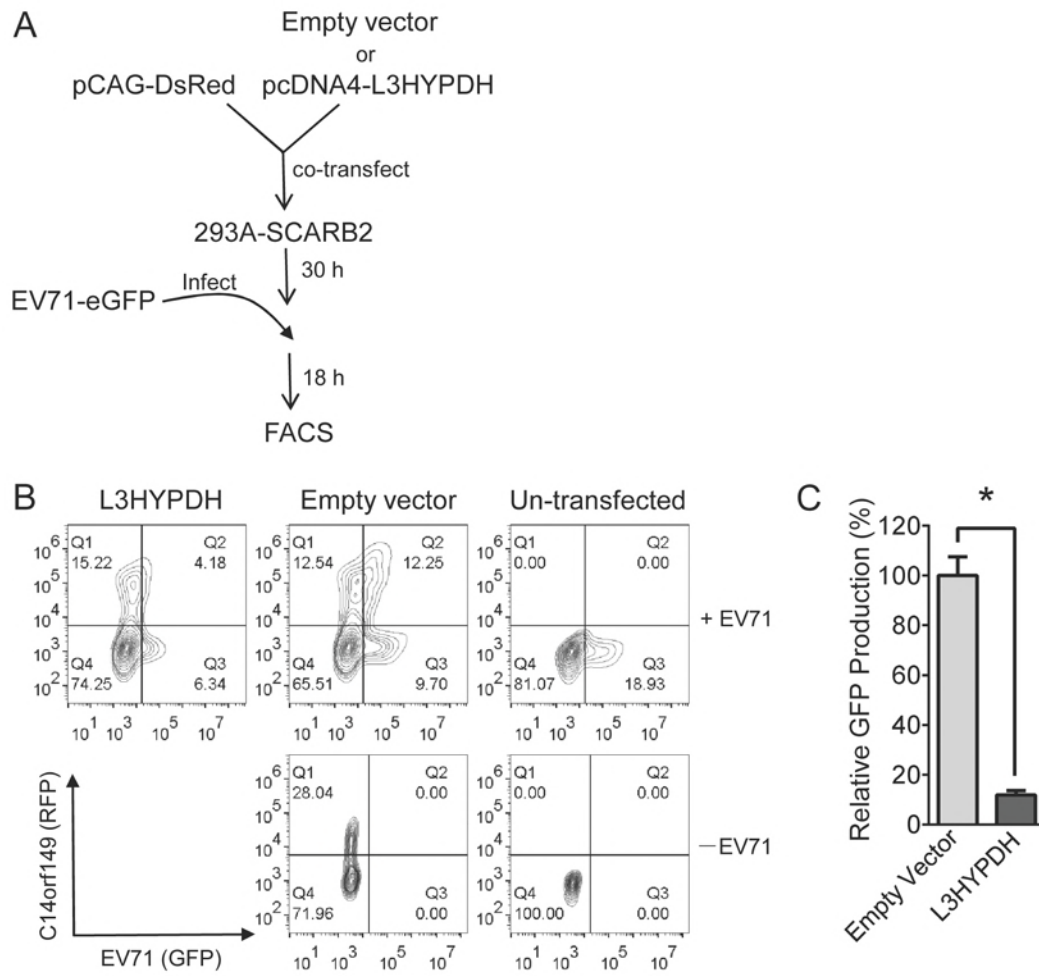

618

619

620 Figure 1

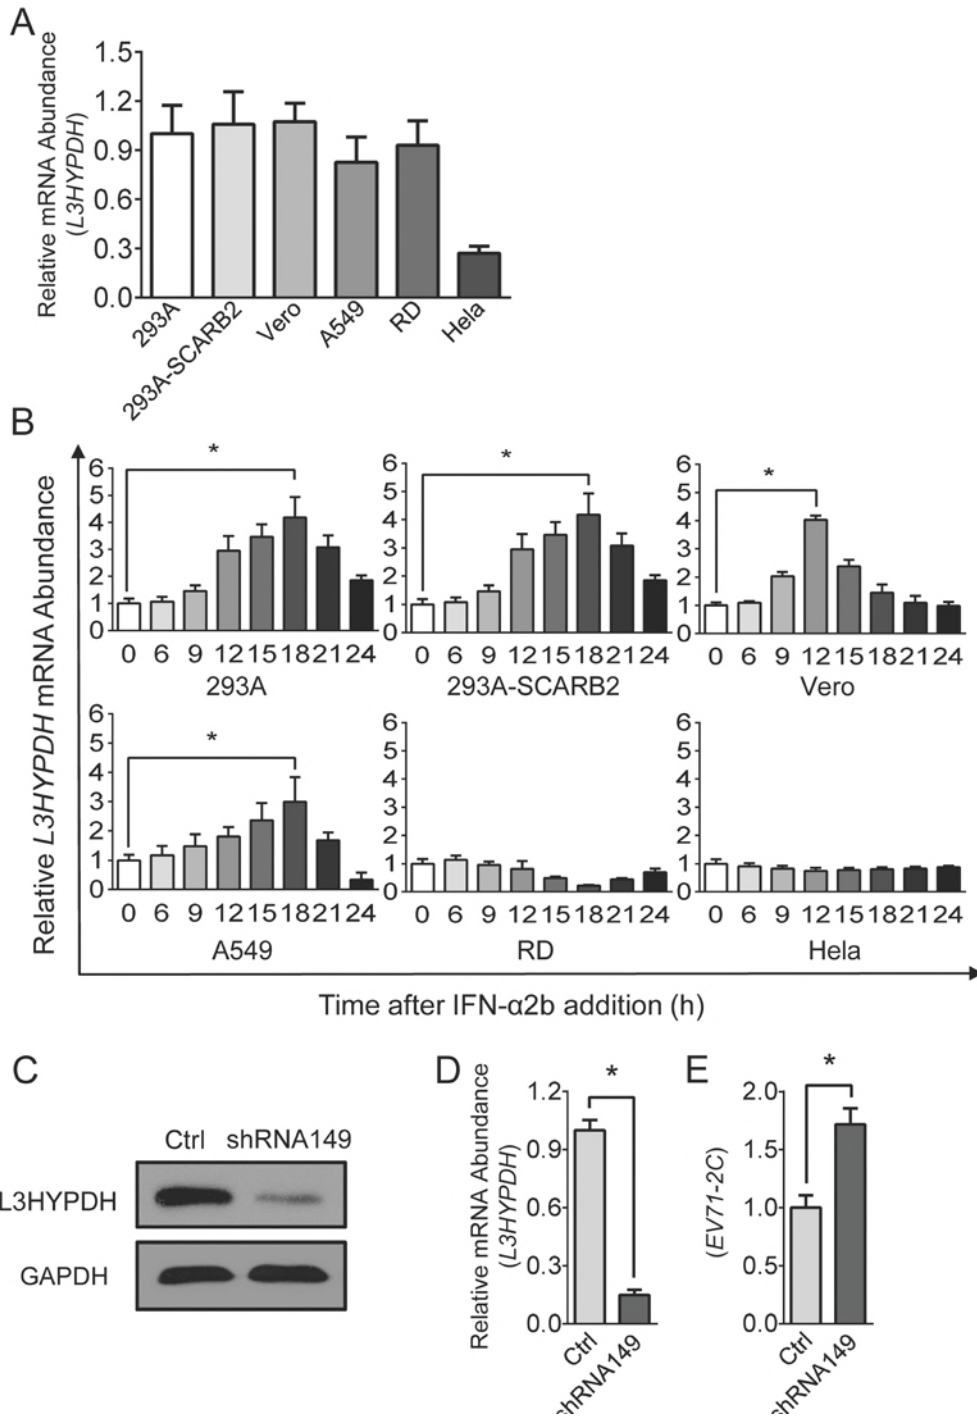

621

622

623 Figure 2

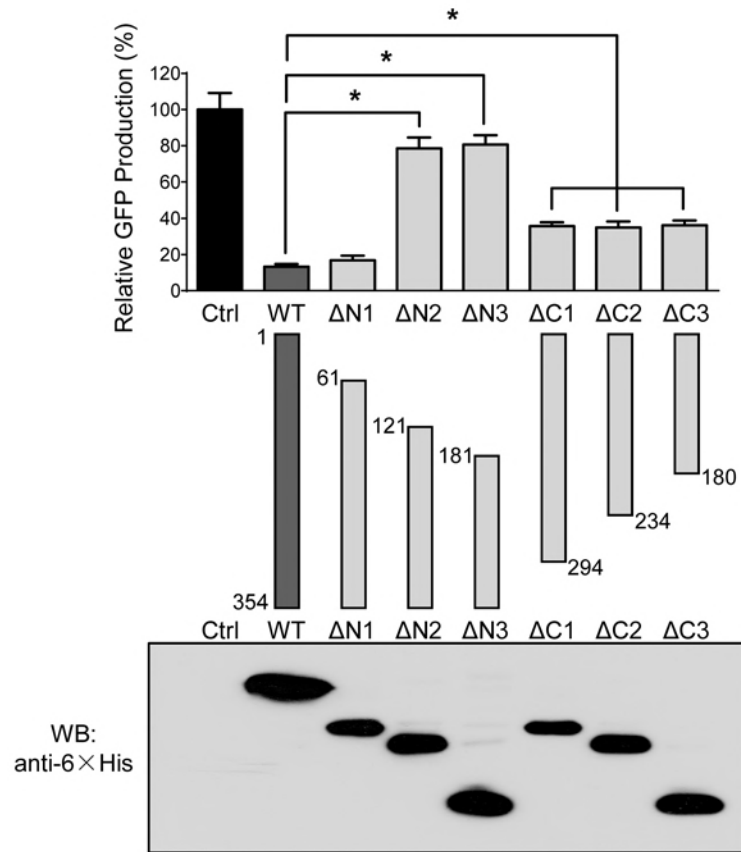

624

625

626 Figure 3



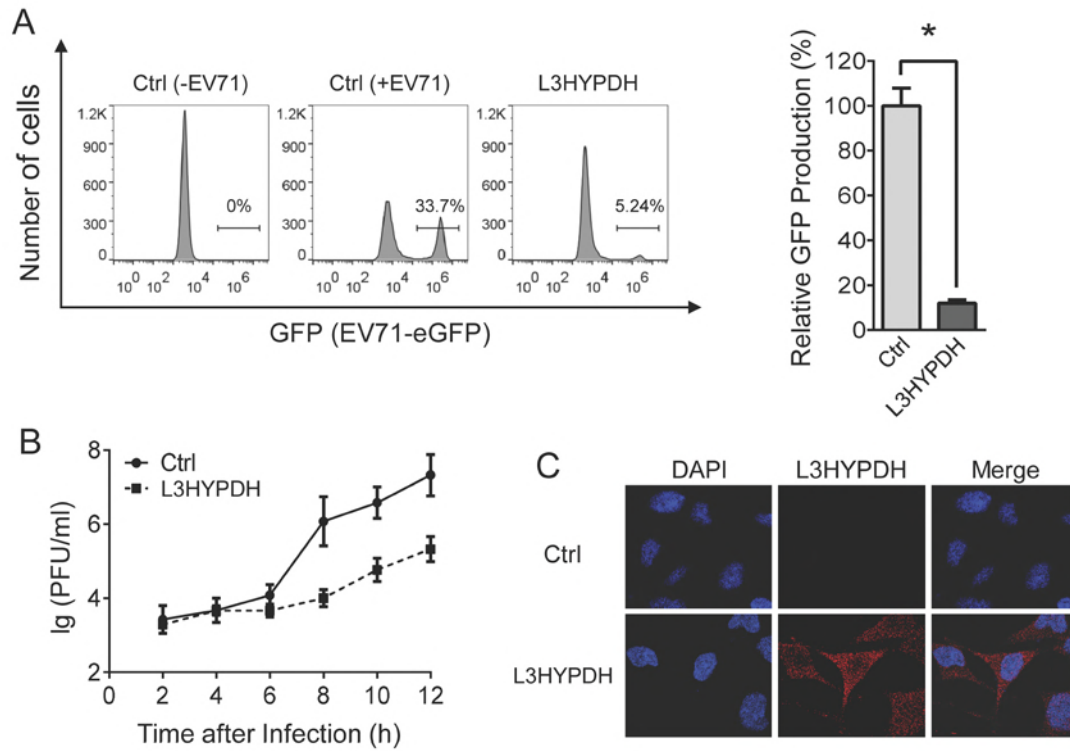

627

628

629 Figure 4

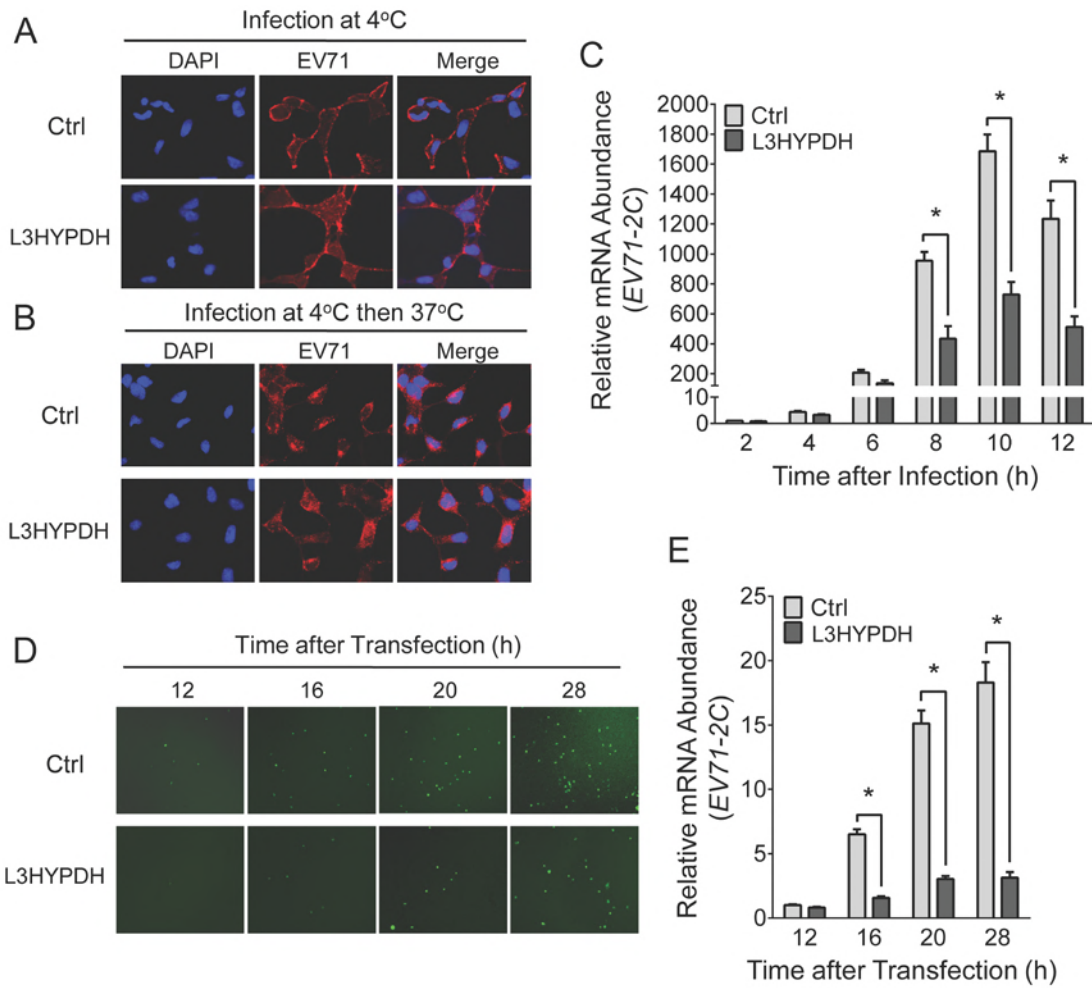

630

631

632 Figure 5

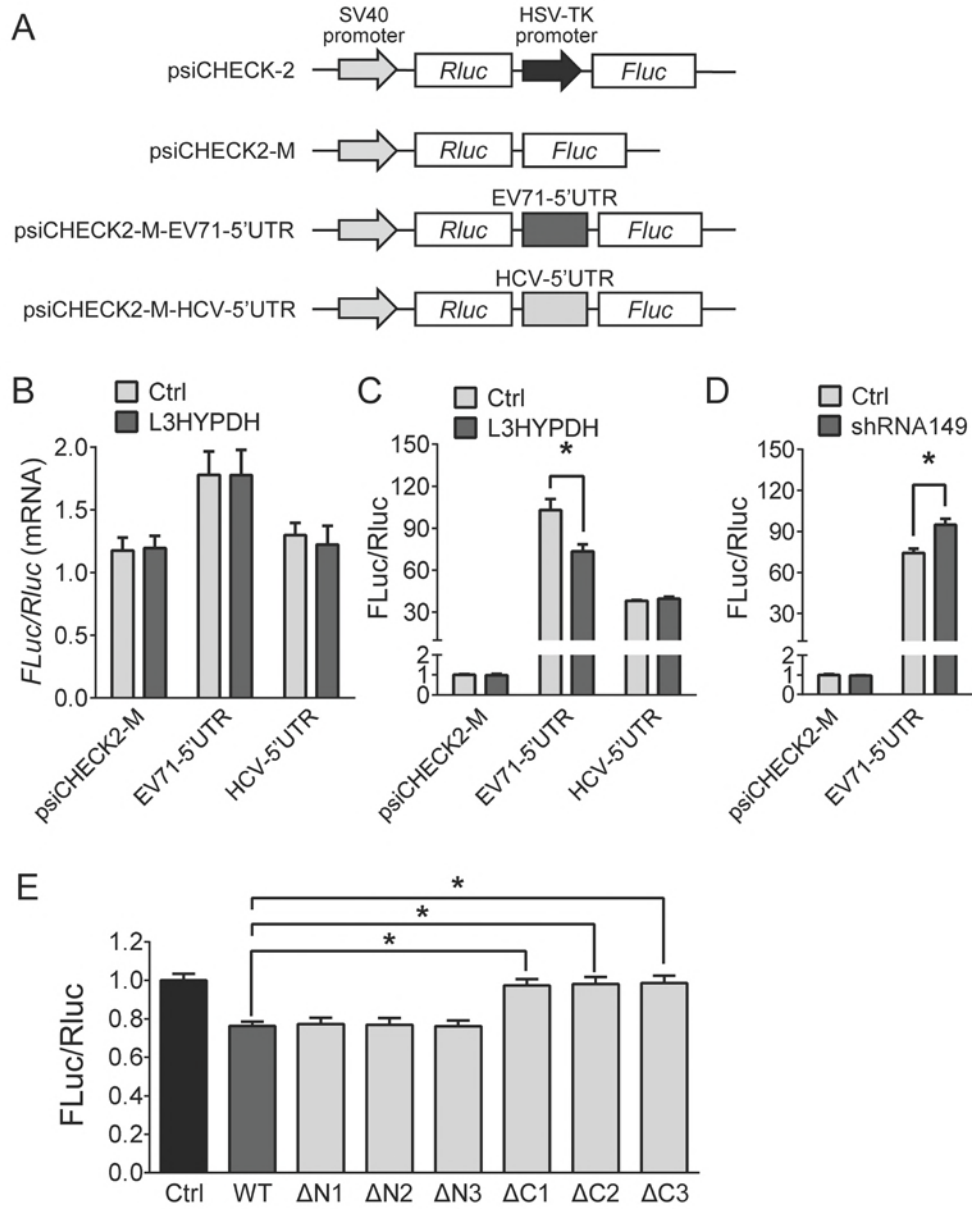

633

634

635 Figure 6

Table S1 Primers used in this study

| Name         | Sequence (5'-3')                       | Target gene, usage                                    |
|--------------|----------------------------------------|-------------------------------------------------------|
| L3HYPDH-F    | CGGGATCCGCCACCATGGAGAGCGC <sup>a</sup> | <i>L3HYPDH</i>                                        |
| L3HYPDH-R    | CACGCGGCCGCACTTGAGAAGAAATCCA           |                                                       |
| L3HYPDH-N1-F | CACGGTACCATGGTGCGGCGACGGCTCA           | L3HYPDHΔN1                                            |
| L3HYPDH-N-R  | CACTCTAGACTGCACTTGAGAAGAAAT            |                                                       |
| L3HYPDH-N2-F | CACGGTACCATGGTGCCGGCGCCCCCTG           | Pairing with L3HYPDH-N-R, L3HYPDHΔN2                  |
| L3HYPDH-N3-F | CACGGTACCATGGGAAAGGTGATGGTGG           | Pairing with L3HYPDH-N-R, L3HYPDHΔN3                  |
| L3HYPDH-C-F  | CACGGTACCATGGAGAGCGCGCTGG              | L3HYPDHΔC1                                            |
| L3HYPDH-C1-R | CACTCTAGACTCATCTGGTTCAGTTCC            |                                                       |
| L3HYPDH-C2-R | CACTCTAGACTTTCACTATCAGGATGA            | Pairing with L3HYPDH-C-F, L3HYPDHΔC2                  |
| L3HYPDH-C3-R | CACTCTAGACTATGTCCAGGAACATCC            | Pairing with L3HYPDH-C-F, L3HYPDHΔC3                  |
| CHECK2-F     | CACGCGGCCGCTCTAGTTTAAA                 | Back-to-back primers, used for generating psiCHECK2-M |
| CHECK2-R     | CACGTCGACATGGCCGATGCTAAGAACATTA        |                                                       |
| EV71-5'UTR-F | CACGCGGCCGCTTAAAACAGCCTGTGG            | EV71-5'UTR                                            |
| EV71-5'UTR-R | CACGTCGACGTTTAGCTGTGTAAAGG             |                                                       |
| HCV-5'UTR-F  | CACGCGGCCGCGGCGCACTCCACCATAG           | HCV-5'UTR                                             |
| HCV-5'UTR-R  | CACGTCGACGATGCACGGTCTACGA              |                                                       |
| QL3HYPDH-F   | AGGAGTGACAGCC CGAATTG                  | <i>L3HYPDH</i> , used for qPCR                        |
| QL3HYPDH-R   | CACATTTTCGCTTCCCTCACAG                 |                                                       |
| QEV71-2C-F   | TGTATGTCTCATTATCAGGGG                  | EV71 2C, used for qPCR                                |
| QEV71-2C-R   | CCACCTGTTGCTTGTAACCGT                  |                                                       |
| QRluc-F      | ATAACTGGTCCGCAGTGGTG                   | <i>Rluc</i> , used for qPCR                           |
| QRluc-R      | AGGCC GCGTTACCATGTAAA                  |                                                       |

|               |                        |                                                                                         |
|---------------|------------------------|-----------------------------------------------------------------------------------------|
| QFluc-F       | AGCACTTCTTCATCGTGGACCG | <i>Fluc</i> , used for qPCR                                                             |
| QFluc-R       | GGCAGCTCGCCGGCATCGTCGT |                                                                                         |
| H-QGAPDH-F    | GAAGGTGAAGGTCGGAGT     | Human <i>GAPDH</i> , used for qPCR <sup>b</sup>                                         |
| H-QGAPDH-R    | GAAGATGGTGATGGGATTTC   |                                                                                         |
| Vero-QGAPDH-R | GAAGATGGTGATGGGGCTTC   | Pairing with H-QGAPDH-F, Monkey <i>GAPDH</i> , used for qPCR of the RNA from Vero cells |

<sup>a</sup> Restriction sites are underlined.

<sup>b</sup>The primers against human *GAPDH* have been described elsewhere (Ng *et al.*, 2002. Clinical Chemistry). All other primers used for the PCR assays are designed using the Primer-BLAST tool (<https://www.ncbi.nlm.nih.gov/tools/primer-blast/>) or acquired from Primer Bank (<https://pga.mgh.harvard.edu/primerbank/>).

## **Knockdown of L3HYPDH impairs anti-EV71 efficacy of IFN- $\alpha$ 2b**

IFN- $\alpha$ 2b treatment combination with RNAi assay were performed to further determine if the endogenous L3HYPDH could suppress EV71 replication, 293A-SCARB2 cells were transfected with pSUPER-GFP-shRNA149, and the GFP-positive cells were sorted by FACS and divided into two parts for IFN- $\alpha$ 2b treatment and mock-treatment, followed by EV71-MZ infection. RT-qPCR assay revealed that the IFN treatment caused a triple increase of the endogenous *L3HYPDH* mRNA level (Figure S1A) and about 40% reduction in the EV71 RNA abundance in 293A-SCARB2 cells (Figure S1B), further validating the perspective that type I IFN is capable of inhibiting EV71 infection. When the expression of *L3HYPDH* was reduced by approximate 80% by RNAi, IFN- $\alpha$ 2b treatment was less effective against EV71 replication and the viral RNA level increased from 0.6 to 0.78 (Figure S1A, S1B). Although the increase in viral yield was not significant, the results indicated that the *L3HYPDH* products play an irreplaceable role in the anti-EV71 action intrigued by IFN- $\alpha$ 2b, suggesting *L3HYPDH* as an important ISG possessing antiviral activity.

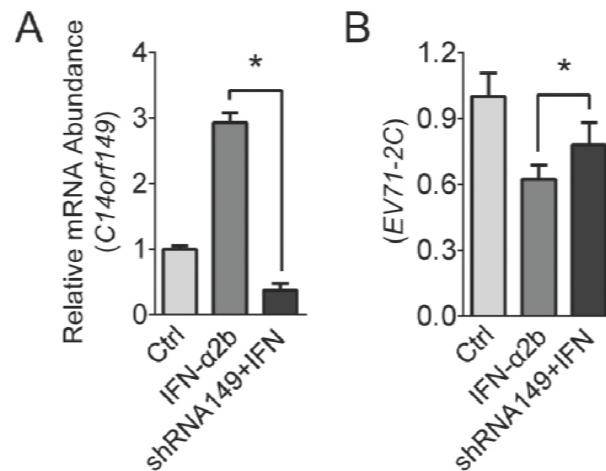

**Fig S1. Effects of *L3HYPDH* knockdown on antiviral activity of IFN- $\alpha$ 2b against**

**EV71.** RT-qPCR analyses of the *L3HYPDH* (A) and EV71 2C (B) mRNA in

293A-SCARB2 upon depression of *L3HYPDH* expression by RNAi in the presence of

IFN- $\alpha$ 2b. 293A-SCARB2 cells were seeded into a 10 cm dish and then transfected

with 5  $\mu$ g of pSUPER-GFP-shRNA149 or pSUPER-GFP. After incubation for 24 h,

the GFP-positive cells were isolated using FACS and divided into two parts, one

treated with 1000 IU/ml of IFN- $\alpha$ 2b, the other mock-treated with water as control,

followed by EV71-MZ infection (MOI, 0.1). Eighteen hours post-infection, total

RNAs were isolated and used for RT-qPCR measurement. The target mRNA level was

normalized to that of GAPDH, and the relative value from the control cells was set as

1. The results are represented as mean $\pm$ SD of three independent experiments. \*,

$P < 0.05$ .
